# Supplementary material
Source: HighWire-hosted journal article supplement (https://erj.ersjournals.com/content/50/4/1700465)
Supplement: inline-supplementary-material-1 [file inline-supplementary-material-1.pdf]

**Supplemental Table S1:** Baseline characteristics of patients initiated with PAH-targeted therapy (PAH-TT) compared to those of patients who did not receive any PAH-TT.

|                                     | Patients not receiving<br>any PAH-TT<br>(n=18) | Patients initiated<br>with PAH-TT<br>(n=97) | P value* |
|-------------------------------------|------------------------------------------------|---------------------------------------------|----------|
| WHO/NYHA (II-III : IV)              | 13 : 5                                         | 77 : 20                                     | 0.49     |
| Radiologic stage (non IV : IV)      | 3 : 15                                         | 29 : 68                                     | 0.25     |
| 6MWD, m                             | 357 ± 167                                      | 311 ± 137                                   | 0.06     |
| RAP, mmHg                           | 7 ± 5                                          | 7 ± 5                                       | 0.76     |
| mPAP, mmHg                          | 39 ± 10                                        | 47 ± 9                                      | <0.001   |
| Cardiac index, L/min/m <sup>2</sup> | 2.8 ± 0.8                                      | 2.6 ± 0.8                                   | 0.31     |
| PVR, WU                             | 6.4 ± 2.7                                      | 9.4 ± 4.4                                   | <0.001   |
| FVC, %                              | 63 ± 21                                        | 64 ± 20                                     | 0.65     |
| KCO, %                              | 57 ± 23                                        | 53 ± 23                                     | 0.46     |

*Abbreviations:* PAH-TT: Pulmonary arterial hypertension-targeted therapy; WHO/NYHA FC: World Health Organisation/New York Heart Association functional class; 6-MWD: 6-minute walk distance; RAP: right atrial pressure; mPAP: mean pulmonary artery pressure; PVR: pulmonary vascular resistance; FVC: forced vital capacity; KCO: Transfer coefficient for carbon monoxide (corrected for lung volume).

\*: Unpaired Student' t-test or Chi-square test as appropriate

**Supplemental Table S2:** Effect of long-term therapy on 6-minute walk distance according to baseline forced vital capacity

| 6-MWD, m<br>(mean±SD)  | n  | Baseline | First follow<br>up visit<br>4.5 months<br>[4.0 – 6.0] | Last follow<br>up visit<br>28.0 months<br>[18.0 – 54.0] | p-value<br>(ANOVA) |
|------------------------|----|----------|-------------------------------------------------------|---------------------------------------------------------|--------------------|
| Overall                | 50 | 334±118  | 330±118                                               | 298±153                                                 | 0.29               |
| FVC ≤ 50% of predicted | 13 | 300±117  | 311±131                                               | 275±156                                                 | 0.39               |
| FVC > 50% of predicted | 37 | 344±118  | 361±126                                               | 323±139                                                 | 0.09               |

*Abbreviations:* 6-MWD: 6-minute walk distance; FVC: Forced vital capacity
