# Supplementary material
Source: HighWire-hosted journal article supplement (https://erj.ersjournals.com/content/50/4/1700465)

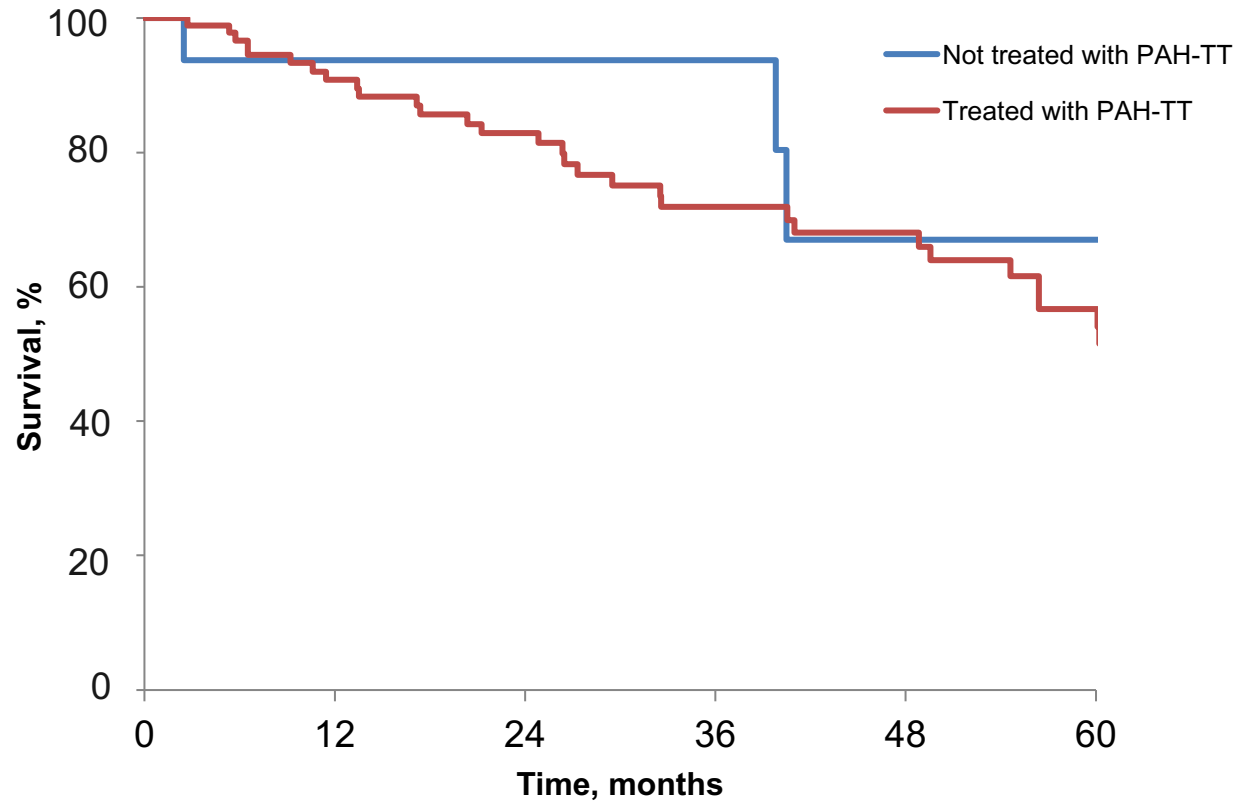

**Patients, at risk (n)**

|                                |           |           |           |           |           |           |
|--------------------------------|-----------|-----------|-----------|-----------|-----------|-----------|
| <b>Treated with PAH TT</b>     | <b>97</b> | <b>74</b> | <b>60</b> | <b>45</b> | <b>37</b> | <b>25</b> |
| <b>Not treated with PAH-TT</b> | <b>18</b> | <b>10</b> | <b>8</b>  | <b>7</b>  | <b>5</b>  | <b>3</b>  |

Supplement: inline-supplementary-material-2 [file inline-supplementary-material-2.pdf]
